# Supplementary material
Source: Springer Nature journal article supplement (https://www.springermedizin.de/resource/supplementary/12935_2006_149_MOESM2_ESM.pdf/9541188)

**A**

Pre-Immune serum

L1 ORF1

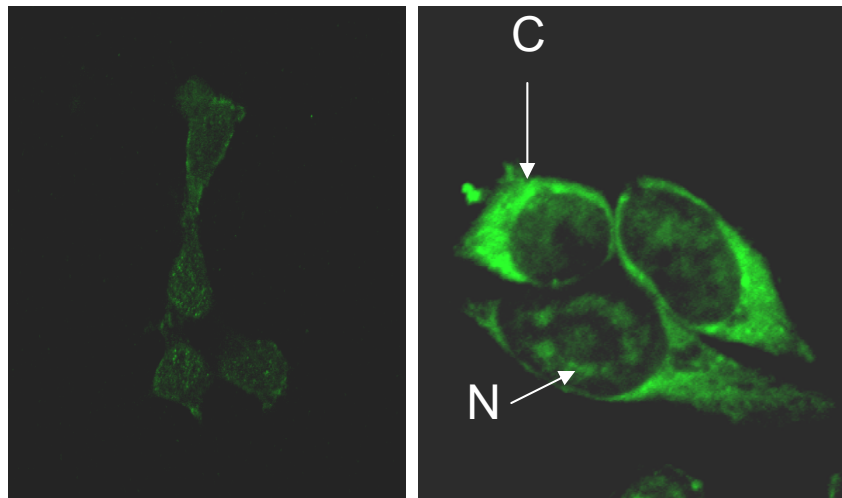**B**

Pre-Immune serum

L1 ORF2

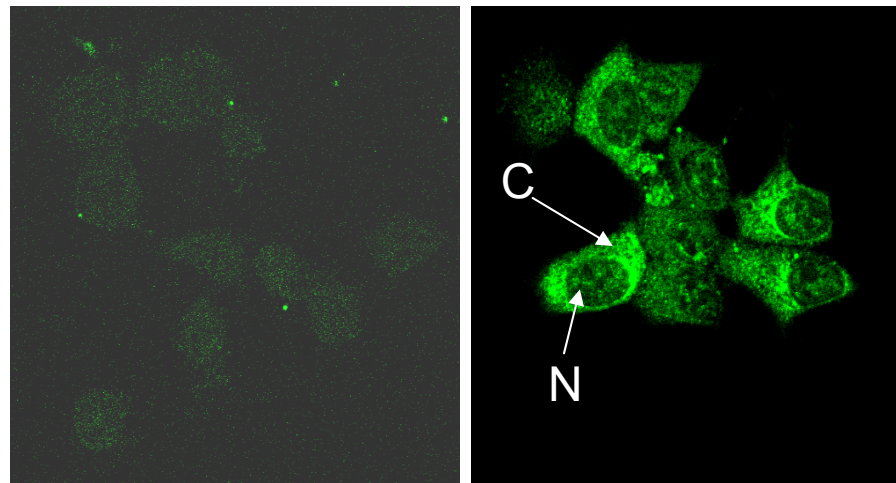**C**

Mock

P1

P2

P3

P4

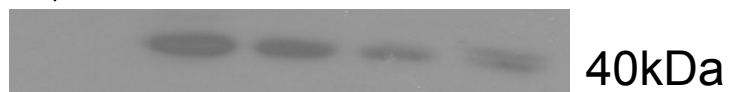

40kDa

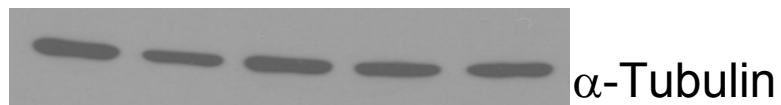 $\alpha$ -Tubulin**D**

Mock

P1

P2

P3

P4

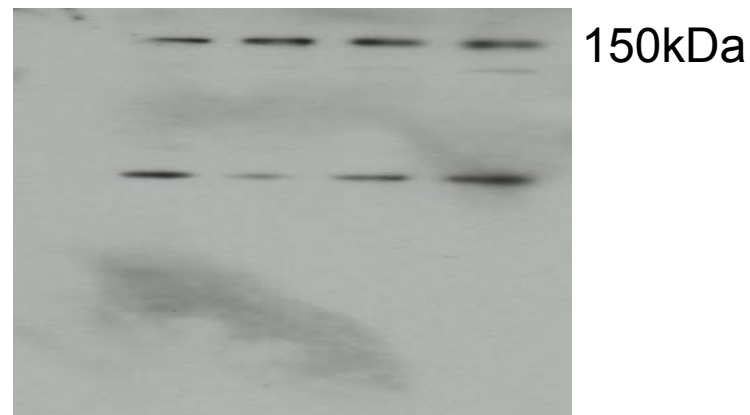

150kDa

Supplement: MOESM2 [file 9541188]
